# Supplementary material for: Wasabi (Eutrema japonicum) Reduces Obesity and Blood Pressure in Diet-Induced Metabolic Syndrome in Rats
Source: MDPI journal article supplement (doi:10.3390/foods11213435), 2022-10-29
Supplement: s1 [file s1]

Article

# Wasabi (*Eutrema japonicum*) Reduces Obesity and Blood Pressure in Diet-Induced Metabolic Syndrome in Rats

Fernanda Santos Thomaz <sup>1,2</sup>, Yuen P. Tan <sup>1</sup>, Craig M. Williams <sup>1</sup>, Leigh C. Ward <sup>1</sup>, Simon Worrall <sup>1</sup> and Sunil K. Panchal <sup>2,3,4,\*</sup>

<sup>1</sup> School of Chemistry and Molecular Biosciences, The University of Queensland, Brisbane, QLD 4072, Australia

<sup>2</sup> Functional Foods Research Group, University of Southern Queensland, Toowoomba, QLD 4350, Australia

<sup>3</sup> School of Science, Western Sydney University, Richmond, NSW 2753, Australia

<sup>4</sup> Global Centre for Land-Based Innovation, Western Sydney University, Richmond, NSW 2753, Australia

\* Correspondence: s.panchal@westernsydney.edu.au; Tel.: +61-2-4570-1932

## Supplementary Information

**Citation:** Thomaz, F.S.; Tan, Y.P.; Williams, C.M.; Ward, L.C.; Worrall, S.; Panchal, S.K. Wasabi (*Eutrema japonicum*) Reduces Obesity and Blood Pressure in Diet-Induced Metabolic Syndrome in Rats. *Foods* **2022**, *11*, 3435. <https://doi.org/10.3390/foods11213435>

Academic Editor: Kyung-Jin Yeum

Received: 2 September 2022

Accepted: 26 October 2022

Published: 29 October 2022

**Publisher's Note:** MDPI stays neutral with regard to jurisdictional claims in published maps and institutional affiliations.

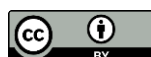

**Copyright:** © 2022 by the authors. Licensee MDPI, Basel, Switzerland. This article is an open access article distributed under the terms and conditions of the Creative Commons Attribution (CC BY) license (<https://creativecommons.org/licenses/by/4.0/>).

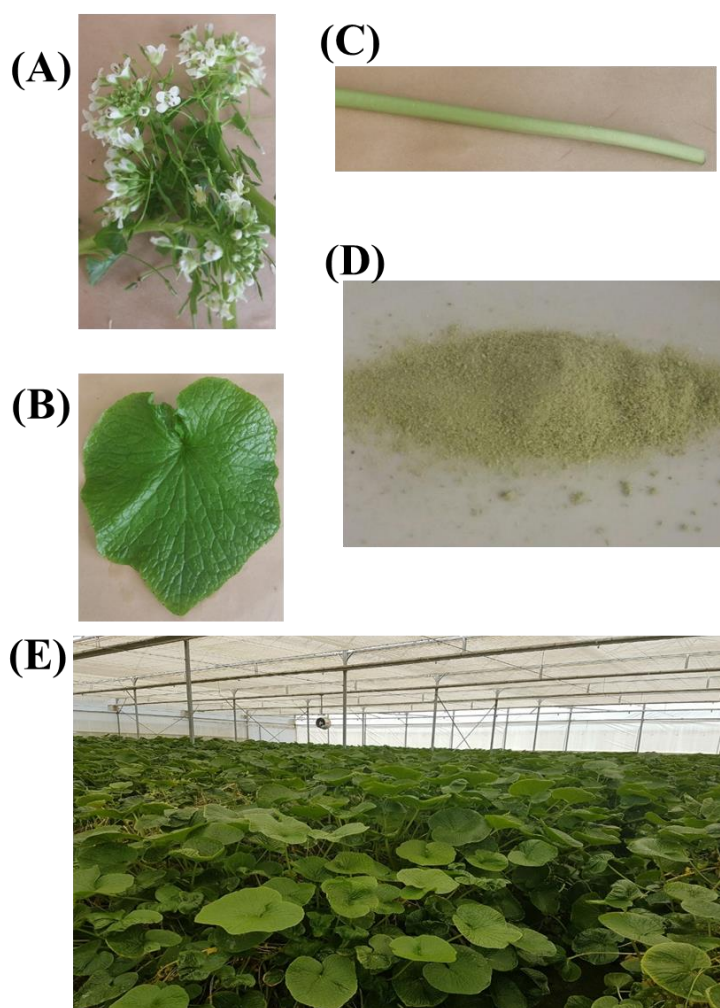

**Figure S1.** Plant sections of Australian hydroponic wasabi: (A) flower; (B) leaf; (C) stem; (D) powder; (E) Shima Wasabi - Northern Tasmania Farm.

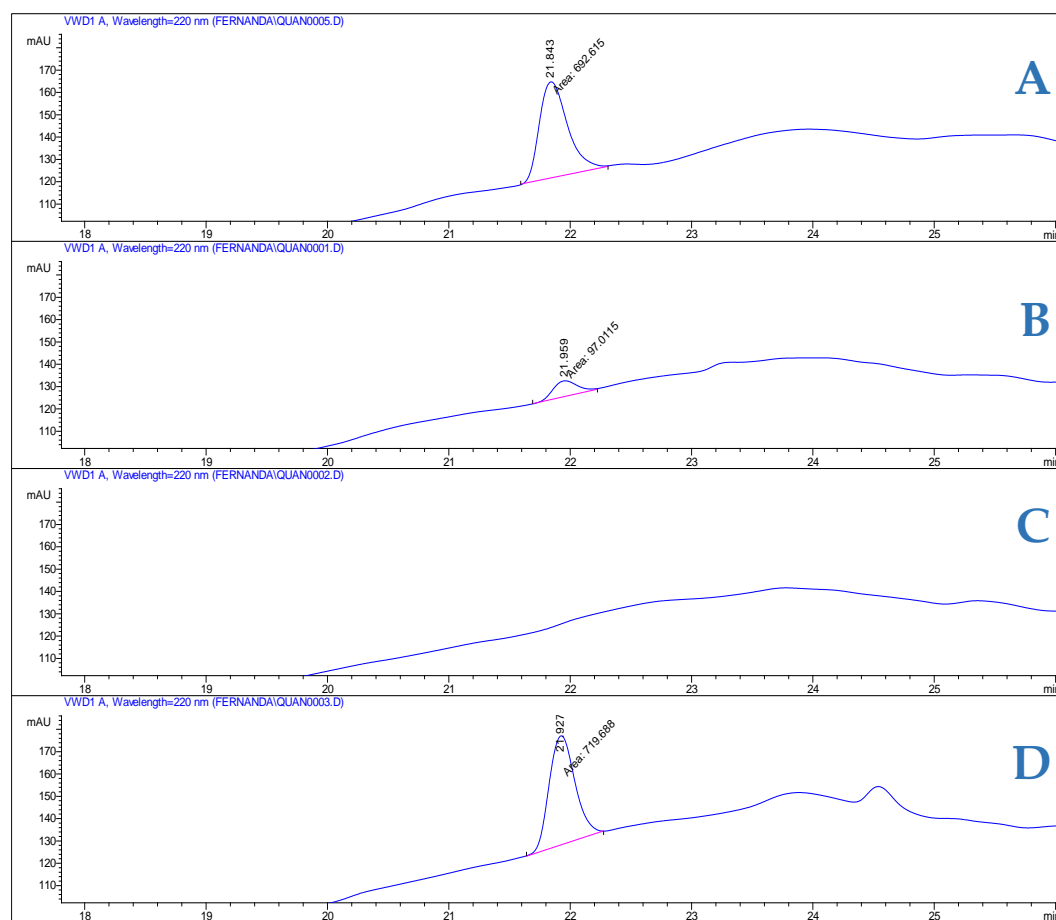

**Figure S2.** Expanded chromatograms of the analysis of 6-MSITC by ultra-high performance liquid chromatography. (A) Chromatogram of 5 mg/mL standard 6-MSITC, (B) Secondary ether extracted material, (C) Residual material after double ether extraction and (D) Primary 6-MSITC ether extraction.

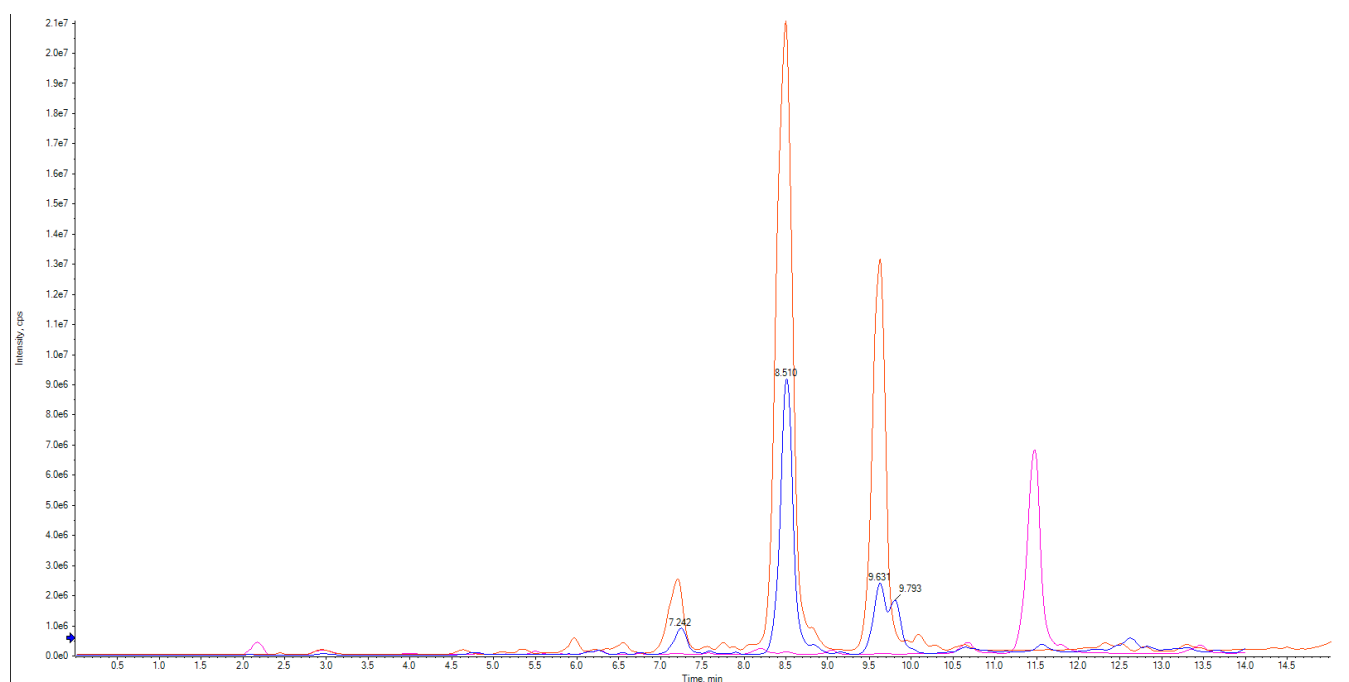

**Figure S3.** uHPLC MS comparison of synthetic 6-MSITC (orange line) and that extracted (blue line) from *E. japonicum*. The pink line shows the fraction containing only residual material from wasabi after the extraction, showing no detectable 6-MSITC.

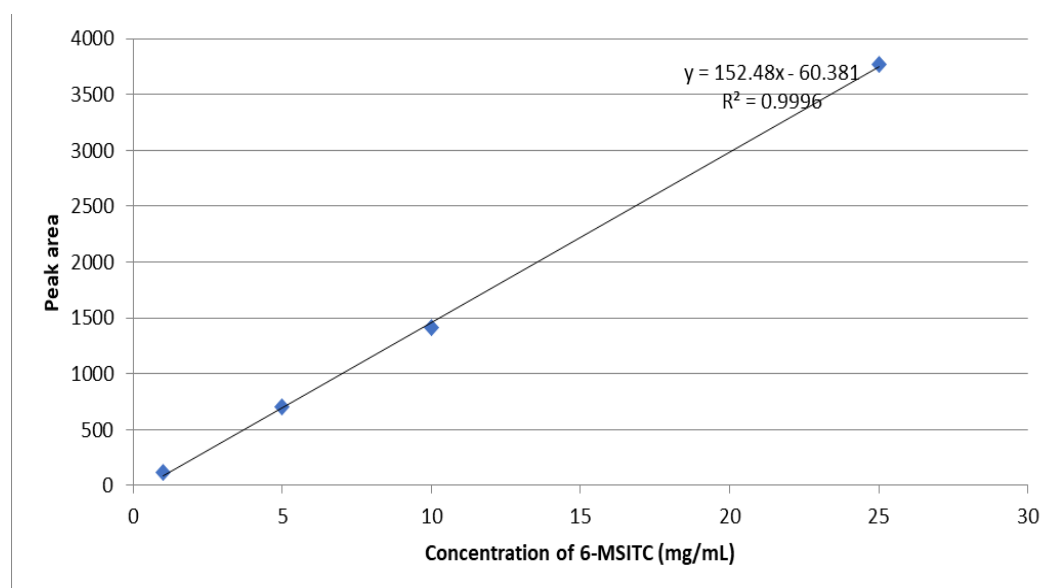

**Figure S4.** Standard curve of 6-MSITC. Results presented by plotting peak areas into a standard curve ( $r^2 > 0.99$ ).

**Table S1.** 6-MSITC concentration in hydroponic wasabi (*E. japonicum*) rhizome and stem blend powder.

| Sample name                                     | Concentration 6-MSITC (mg/mL) |
|-------------------------------------------------|-------------------------------|
| Primary ether extracted material                | 5.26                          |
| Secondary ether extracted material              | 1.85                          |
| Residual material after double ether extraction | None detected                 |

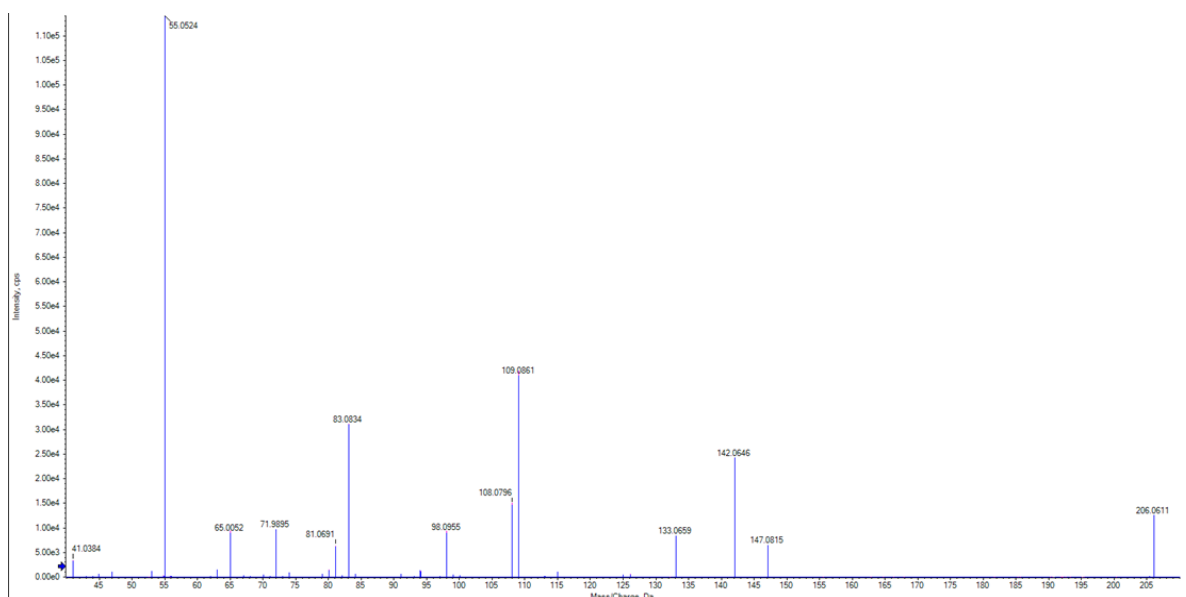

**Figure S5.** MS/MS spectra of *Eutrema japonicum* rhizome sample derived from *n*-hexane/diethyl ether extraction.

**Table S2.** Peak assignment identified the fragmentation pattern of 6-MSITC.

| Formula                                                                             | Observed ( <i>m/z</i> ) | Calculated ( <i>m/z</i> ) |
|-------------------------------------------------------------------------------------|-------------------------|---------------------------|
| CH <sub>3</sub> SO-(CH <sub>2</sub> ) <sub>6</sub> -NCS (M+H)                       | 206.0611                | 206.0673                  |
| CH <sub>3</sub> SO-(CH <sub>2</sub> ) <sub>5</sub> -CH <sub>2</sub> <sup>+</sup>    | 147.0815                | 147.0838                  |
| SCN-(CH <sub>2</sub> ) <sub>5</sub> -CH <sub>2</sub> <sup>+</sup>                   | 142.0646                | 142.0685                  |
| CH <sub>3</sub> SO-(CH <sub>2</sub> ) <sub>4</sub> -(CH <sub>2</sub> ) <sup>+</sup> | 133.0659                | 133.0683                  |
| CN-(CH <sub>2</sub> ) <sub>4</sub> -(CH)=(CH) <sup>+</sup>                          | 108.0796                | 108.0808                  |
| NCS-(CH <sub>2</sub> ) <sup>+</sup>                                                 | 71.9895                 | 71.9902                   |

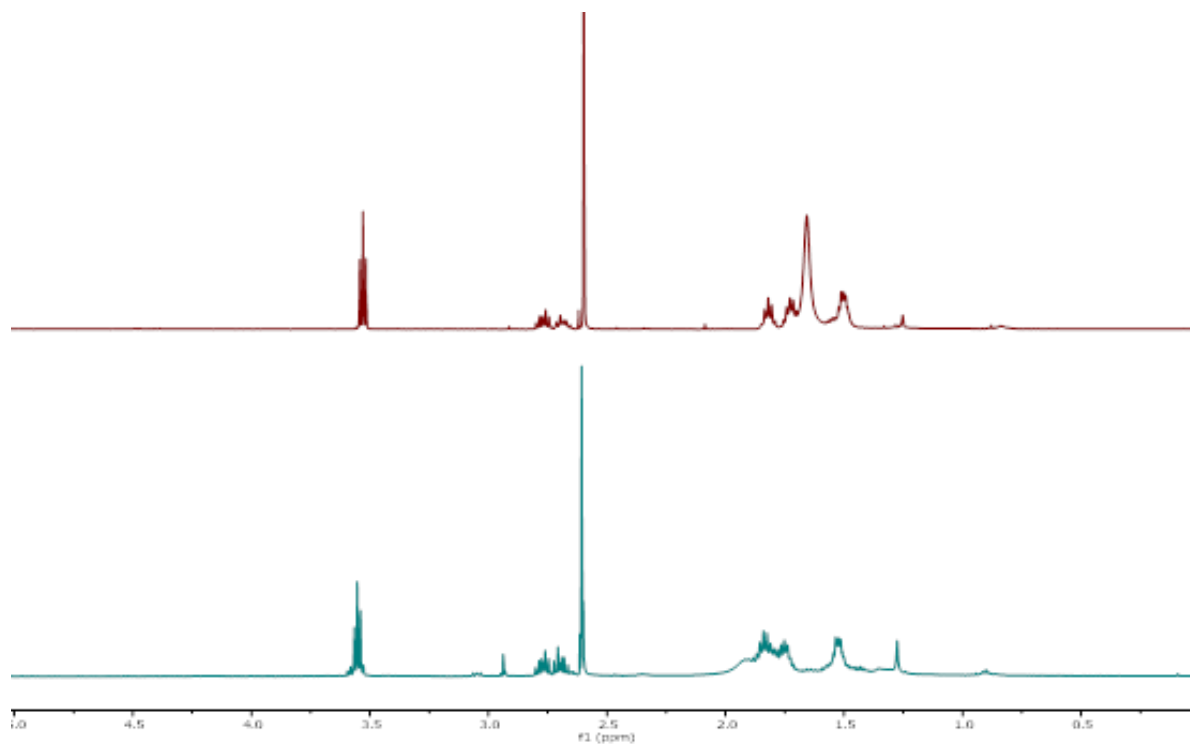**Figure S6.** <sup>1</sup>H NMR comparison for authentic 6-MSITC (Top) and isolated 6-MSITC (bottom) from *E. japonicum* recorded in CDCl<sub>3</sub>.

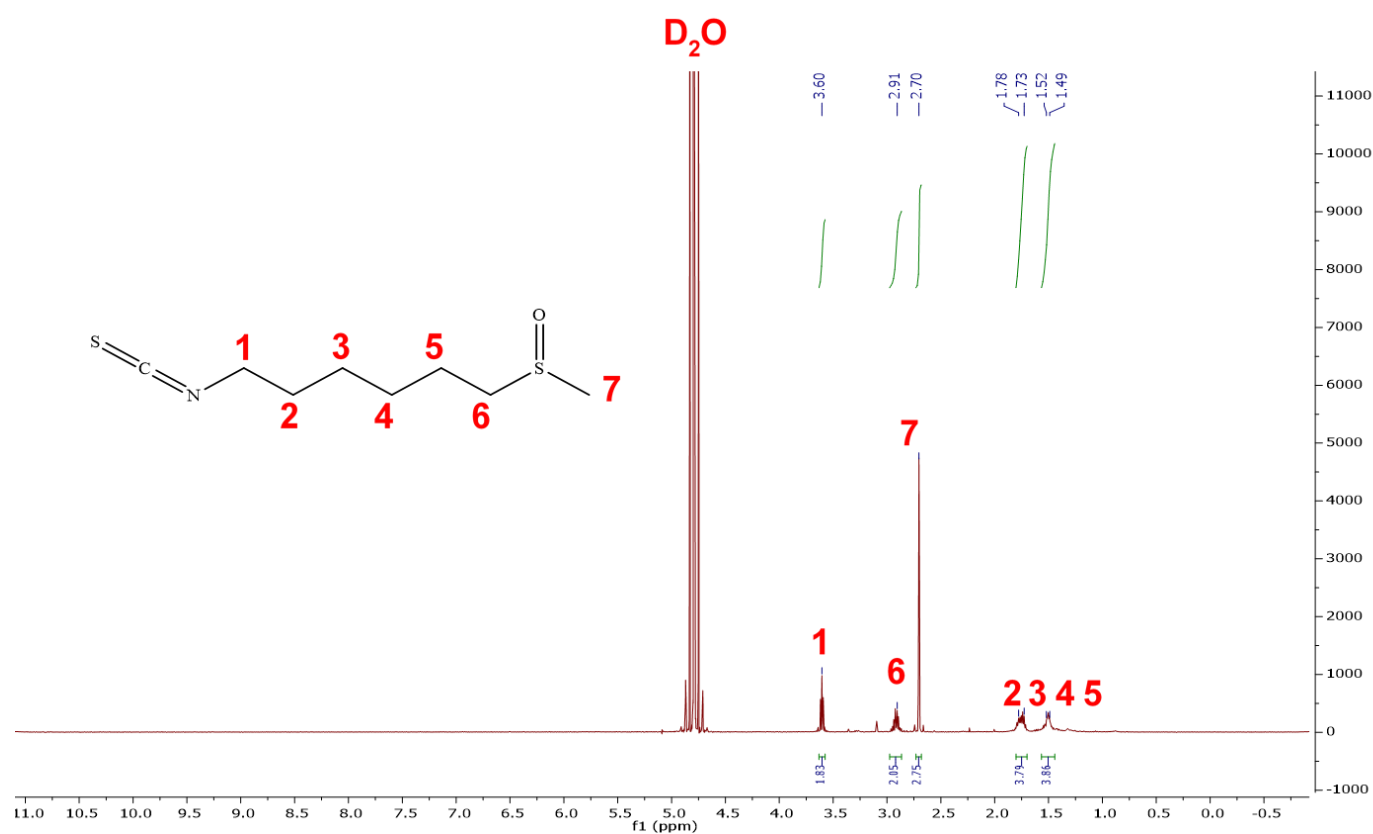

**Figure S7.** The <sup>1</sup>H NMR spectra of 6-MSITC extracted from wasabi rhizome and stems.

**Table S3.** Tabulated <sup>1</sup>H NMR data for 6-MSITC in D<sub>2</sub>O at 500 MHz.

| Position | δ <sup>1</sup> H (ppm), multiplicity |
|----------|--------------------------------------|
| 1        | 3.60, t                              |
| 2        | 1.80, m                              |
| 3        | 1.71, m                              |
| 4        | 1.55, m                              |
| 5        | 1.47, m                              |
| 6        | 2.95, m                              |
| 7        | 2.88, s                              |

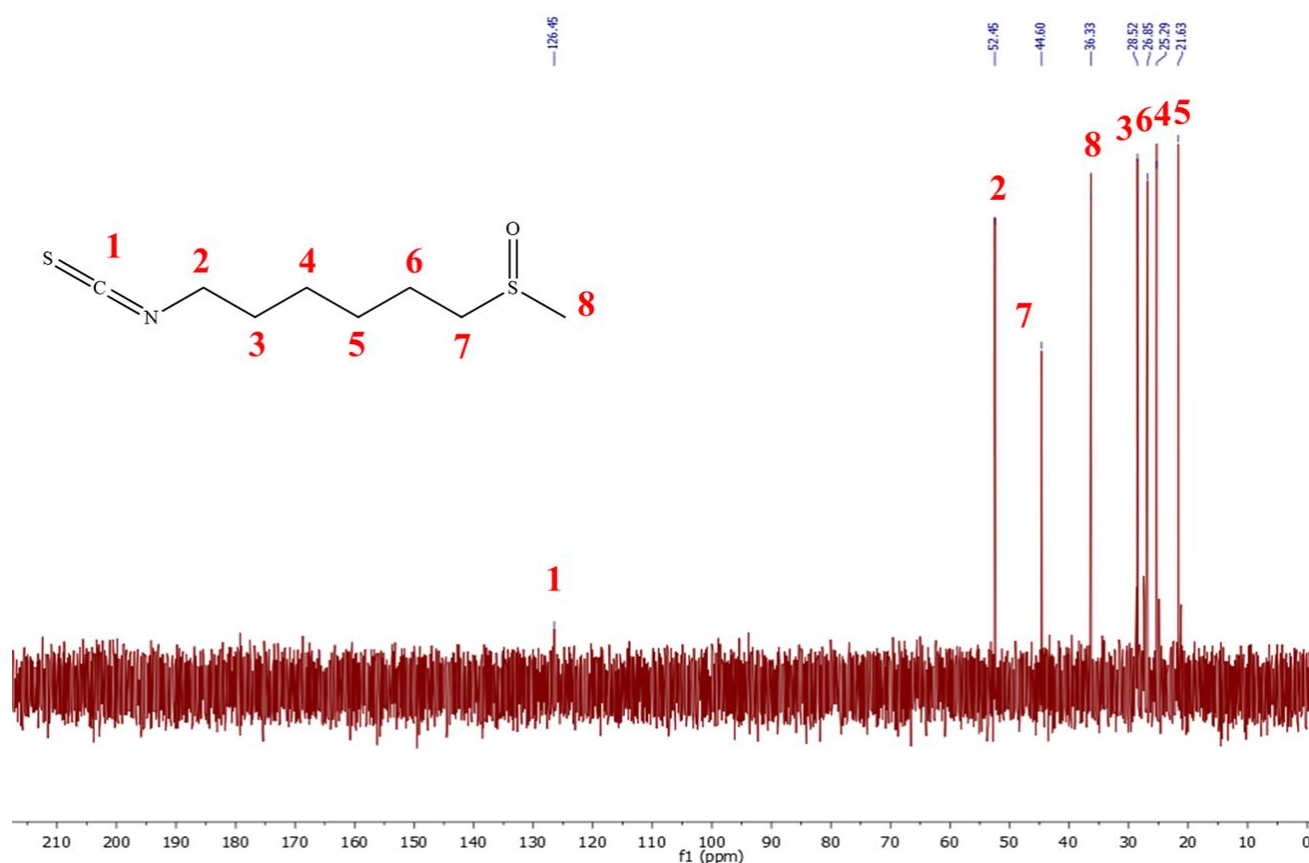

**Figure S8.**  $^{13}\text{C}$  NMR of the isolated 6-MSITC recorded in  $\text{D}_2\text{O}$  at 125 MHz.

**Table S4.**  $^{13}\text{C}$  NMR data for 6-MSITC in  $\text{D}_2\text{O}$  at 125 MHz.

| Position | $\delta^{13}\text{C}$ (ppm), type |
|----------|-----------------------------------|
| 1        | 126.5, $\text{CH}_2\text{-N}$     |
| 2        | 52.5, $\text{CH}_2$               |
| 3        | 28.5, $\text{CH}_2$               |
| 4        | 25.3, $\text{CH}_2$               |
| 5        | 21.6, $\text{CH}_2$               |
| 6        | 26.9, $\text{CH}_2$               |
| 7        | 44.6, $\text{CH}_2$               |
| 8        | 36.3, $\text{CH}_3\text{-SO-}$    |
